# Supplementary material for: Vertical and lateral flux on the continental slope off Pakistan: correlation of sediment core and trap results
Source: Copernicus journal article supplement (doi:10.5194/bg-11-3107-2014), 2014-06-16
Supplement: Supplementary file 1 [file bg-11-3107-2014-supplement.zip]

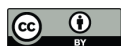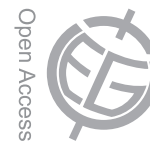

## *Supplement of*

# **Vertical and lateral flux on the continental slope off Pakistan: correlation of sediment core and trap results**

**H. Schulz and U. von Rad**

*Correspondence to:* H. Schulz ([hartmut.schulz@uni-tuebingen.de](mailto:hartmut.schulz@uni-tuebingen.de))

- Supplement-Cover-Letter.pdf
- Schulz and von Rad BGD 2014 M32-2MC3 Supplement 1.jpg
- Schulz and von Rad BGD 2014 M32-2MC5 Supplement 2.jpg
